# Supplementary figures and images for: Mathematical modelling of miRNA mediated BCR.ABL protein regulation in chronic myeloid leukaemia vis-a-vis therapeutic strategies
Source: Royal Society of Chemistry journal article supplement (doi:10.1039/c3ib20230e), 2013-01-01

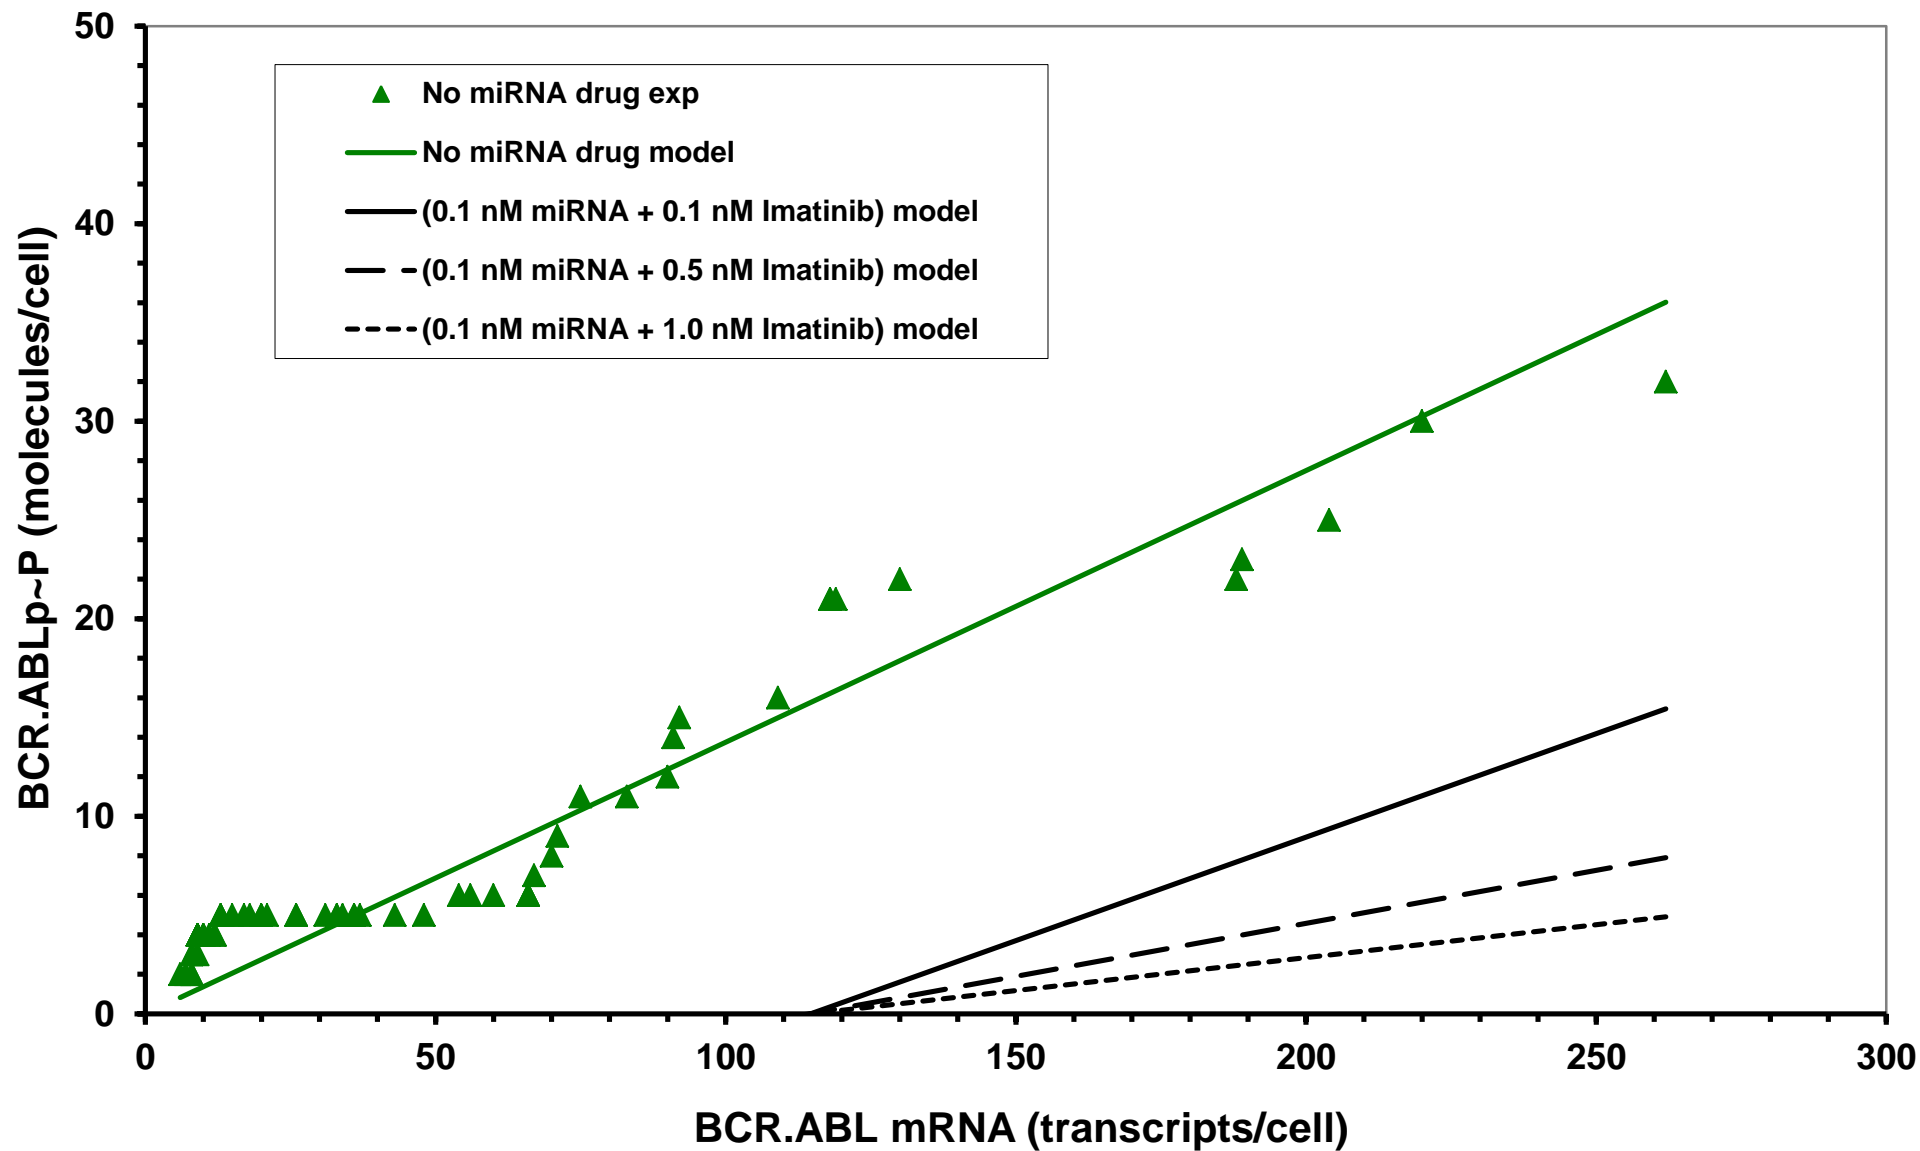

Supplement: c3ib20230e_2.pdf [file c3ib20230e_2.pdf]
